# Supplementary material for: Depletion of [³H] Amitraz in Sheep
Source: Research Square preprint supplement (doi:10.21203/rs.3.rs-7792400/v1), 2025-11-07
Supplement: Supplementary file 1 [file 1083680b519633174928b6be.xlsx]

## Sheet: Sheet2
	V (mL), 5 uCi/mL	Working volume	Nominal Concentration, uCi/mL	Nominal Concentration, uCi/kg	Nominal Activity, uCi	Scintilation intensity, CPM	Estimated concentration, uCi/mL	Estimated concentration, uCi/kg	Estimated Activity, uCi	Recovery (%), uCi/mL	Recovery (%), uCi
						235
	0.05	25	0.25	6250	6.25	500353	0.221305	5532.63	5.53263	88.522	88.522
	0.1	25	0.5	12500	12.5	992824	0.439342	10983.5	10.9835	87.8683	87.8683
	0.2	25	1	25000	25	1598322	0.70742	17685.5	17.6855	70.742	70.742
	0.5	25	2.5	62500	62.5	4922482	2.17916	54479	54.479	87.1664	87.1664
	Slope	2258661
	blank	500
											`
