# Supplementary material for: Depletion of [³H] Amitraz in Sheep
Source: Research Square preprint supplement (doi:10.21203/rs.3.rs-7792400/v1), 2025-11-07
Supplement: Supplementary file 2 [file 10d87bebcc43c2ceea8b7039.xlsx]

## Sheet: Sheet2
	V (mL), 5 uCi/mL	Working volume	Nominal Concentration, uCi/mL	Nominal Activity, uCi	Scintilation intensity, CPM	Estimated concentration, uCi/mL	Estimated Activity, uCi	Recovery (%), uCi/mL	Recovery (%), uCi
					235
	0.1	25	0.02	0.5	53694	0.0205324	0.513309	102.662	102.662
	0.2	25	0.04	1	91573	0.0351122	0.877804	87.7804	87.7804
	0.3	25	0.06	1.5	129475	0.0497008	1.24252	82.8347	82.8347
	0.4	25	0.08	2	173622	0.0666932	1.66733	83.3665	83.3665
	0.5	25	0.1	2.5	209382	0.0804574	2.01144	80.4574	80.4574
	Slope	2598045
	blank	350
									`
