# Supplementary material for: Depletion of [³H] Amitraz in Sheep
Source: Research Square preprint supplement (doi:10.21203/rs.3.rs-7792400/v1), 2025-11-07
Supplement: Supplementary file 3 [file 1676c41b3ed26ec22f90cffe.xlsx]

## Sheet: Sheet2
	V (mL), 5 uCi/mL	Working volume	Nominal Concentration, uCi/mL	Nominal Concentration, uCi/kg	Nominal Activity, uCi	Scintilation intensity, CPM	Estimated concentration, uCi/mL	Estimated concentration, uCi/kg	Estimated Activity, uCi	Recovery (%), uCi/mL	Recovery (%), uCi
						239
	0.001	25	0.005	125	0.125	9568	0.00415041	103.76	0.10376	83.0083	83.0083
	0.01	25	0.05	1250	1.25	94820	0.0425352	1063.38	1.06338	85.0704	85.0704
	0.1	25	0.5	12500	12.5	1104948	0.497346	12433.7	12.4337	99.4693	99.4693
	0.2	25	1	25000	25	2300291	1.03555	25888.8	25.8888	103.555	103.555
	Slope	2220983
	blank	350
											`
