# Supplementary material for: Depletion of [³H] Amitraz in Sheep
Source: Research Square preprint supplement (doi:10.21203/rs.3.rs-7792400/v1), 2025-11-07
Supplement: Supplementary file 4 [file 4e22a068c9409ab7b6730199.xlsx]

## Sheet: Sheet2
	V (mL), 5 uCi/mL	Working volume	Nominal Concentration, uCi/mL	Nominal Activity, uCi	Scintilation intensity, CPM	Estimated concentration, uCi/mL	Estimated Activity, uCi	Recovery (%), uCi/mL	Recovery (%), uCi
	0.1	25	0.02	0.5	54021	0.0185485	0.463712	92.7424	92.7424
	0.2	25	0.04	1	92899	0.0319971	0.799927	79.9927	79.9927
	0.3	25	0.06	1.5	130911	0.0451461	1.12865	75.2435	75.2435
	0.4	25	0.08	2	182321	0.0629298	1.57324	78.6622	78.6622
	0.5	25	0.1	2.5	204800	0.0707057	1.76764	70.7057	70.7057
	Slope	2.89086e+06
	blank	400
									`
