# Supplementary material for: Depletion of [³H] Amitraz in Sheep
Source: Research Square preprint supplement (doi:10.21203/rs.3.rs-7792400/v1), 2025-11-07
Supplement: Supplementary file 5 [file 69bb7d62e5e50c37fa59edba.xlsx]

## Sheet: Sheet1
			Urine	uCi
	70 uCi/sheep
							1	3	5	7	14	21	28
	Sheep | Hours	0	1	3	5	7	24	72	120	168	336	504	672
	1	0.013	2.49	8.32	6.17	3.69	0.29
	2	0.013	0.09	0.69	1.02	0.49	0.22
	3	0.013	2.13	6.73	5.62	3.63	0.31
	4	0.013	0.28	1.25	0.8	0.67	0.11	0.01
	5	0.013	2.15	6.75	5.28	2.94	0.16	0.06
	6	0.013	0.01	1.15	0.9	0.44	0.03	0.22
	7	0.013	2.17	8.48	5.56	2.89	0.13	0.12	0.07
	8	0.013	0.22	1.16	0.78	0.64	0.03	0.02	0.01
	9	0.013	2.18	8.13	6.15	3.74	0.39	0.19	0.14
	10	0.013	0.4	0.93	1.21	0.53	0.14	0.05	0.09	0.07
	11	0.013	2.57	7.15	5.41	2.95	0.21	0.13	0.1	0.06
	12	0.013	0.48	0.95	0.73	0.46	0.05	0.26	0.13	0.09
	13	0.013	2.29	9.4	5.76	3.4	0.35	0.19	0.15	0.05	0.02
	14	0.013	0.33	0.69	0.68	0.59	0.01	0.05	0.08	0.06	0.05
	15	0.013	2.52	8.77	5.08	2.94	0.25	0.17	0.09	0.07	0.05
	16	0.013	0.01	1.1	0.94	0.63	0.25	0.1	0.05	0.01	0.01	0.02
	17	0.013	2.66	9.22	5.99	3.15	0.33	0.2	0.09	0.08	0.12	0.01
	18	0.013	0.03	0.83	0.7	0.61	0.16	0.26	0.25	0.15	0.08	0.02
	19	0.013	1.67	8.9	6.11	3.47	0.05	0.01	0.03	0.01	0.01	0.11	0.1
	20	0.013	0.08	1.16	1.06	0.25	0.08	0.04	0.03	0.06	0.01	0.01	0.01
	21	0.013	2.45	8.71	6.45	3.52	0.3	0.11	0.09	0.11	0.03	0.01	0.02
	min	0.013	0.01	0.69	0.68	0.25	0.01	0.01	0.01	0.01	0.01	0.01	0.01
	max	0.013	2.66	9.4	6.45	3.74	0.39	0.26	0.25	0.15	0.12	0.11	0.1
	average	0.013	1.29571	4.78429	3.44762	1.98238	0.183333	0.121667	0.0933333	0.0683333	0.0422222	0.03	0.0433333
	stdev	6.93889e-18	1.0751	3.67799	2.46675	1.40533	0.115153	0.082479	0.0571159	0.0369309	0.0355208	0.0360555	0.0402768
		0	1	3	5	7	24	72	120	168	336	504	672
	average	0.013	1.29571	4.78429	3.44762	1.98238	0.183333	0.121667	0.0933333	0.0683333	0.0422222	0.03	0.0433333
	stdev	6.93889e-18	1.0751	3.67799	2.46675	1.40533	0.115153	0.082479	0.0571159	0.0369309	0.0355208	0.0360555	0.0402768
