# Supplementary material for: Depletion of [³H] Amitraz in Sheep
Source: Research Square preprint supplement (doi:10.21203/rs.3.rs-7792400/v1), 2025-11-07
Supplement: Supplementary file 6 [file 78b4b1b151258b657d208fc1.xlsx]

## Sheet: Sheet2
	V (mL), 5 uCi/mL	Working volume	Nominal Concentration, uCi/mL	Nominal Concentration, uCi/kg	Nominal Activity, uCi	Scintilation intensity, CPM	Estimated concentration, uCi/mL	Estimated concentration, uCi/kg	Estimated Activity, uCi	Recovery (%), uCi/mL	Recovery (%), uCi
						389
	0.001	25	0.005	125	0.125	8982	0.00401203	100.301	0.100301	80.2407	80.2407
	0.01	25	0.05	1250	1.25	84482	0.0395147	987.867	0.987867	79.0294	79.0294
	0.1	25	0.5	12500	12.5	966732	0.454378	11359.5	11.3595	90.8757	90.8757
	0.2	25	1	25000	25	2049372	0.963472	24086.8	24.0868	96.3472	96.3472
	Slope	2126602
	blank	450
											`
