# Supplementary material for: Depletion of [³H] Amitraz in Sheep
Source: Research Square preprint supplement (doi:10.21203/rs.3.rs-7792400/v1), 2025-11-07
Supplement: Supplementary file 7 [file 9401be2c704f0752030d0bd0.xlsx]

## Sheet: Sheet1
			uCi
	70 uCi/sheep
	Sheep	Kidney	Liver	Muscle	Fat			Day	Kidney	Liver	Muscle	Fat
	1	0.2	0.16	0.17	1.94	1 day		1	0.2	0.16	0.163333	1.96333
	2	0.2	0.16	0.16	1.97			3	0.153333	0.12	0.12	1.67
	3	0.2	0.16	0.16	1.98			4	0.113333	0.0966667	0.0866667	1.49
	4	0.16	0.12	0.12	1.66	3 days		7	0.08	0.0766667	0.06	1.32333
	5	0.15	0.12	0.12	1.67			14	0.0633333	0.06	0.0466667	1.16333
	6	0.15	0.12	0.12	1.68			21	0.05	0.05	0.03	1.01667
	7	0.11	0.1	0.08	1.49	4 days		28	0.04	0.04	0.02	0.883333
	8	0.12	0.09	0.09	1.46
	9	0.11	0.1	0.09	1.52
	10	0.08	0.07	0.06	1.31	7 days
	11	0.08	0.08	0.06	1.35
	12	0.08	0.08	0.06	1.31
	13	0.06	0.06	0.05	1.17	14 days
	14	0.07	0.06	0.05	1.18
	15	0.06	0.06	0.04	1.14
	16	0.05	0.05	0.03	1.01	21 days
	17	0.05	0.05	0.03	1.04
	18	0.05	0.05	0.03	1
	19	0.04	0.04	0.02	0.91	28 days
	20	0.04	0.04	0.02	0.87
	21	0.04	0.04	0.02	0.87
	min	0.04	0.04	0.02	0.87
	max	0.2	0.16	0.17	1.98
	average	0.1	0.0861905	0.0752381	1.35857
	stdev	0.0546852	0.0395783	0.0479701	0.351396
