# Supplementary material for: Depletion of [³H] Amitraz in Sheep
Source: Research Square preprint supplement (doi:10.21203/rs.3.rs-7792400/v1), 2025-11-07
Supplement: Supplementary file 8 [file a6bcf363c8ddec1c304c0da7.xlsx]

## Sheet: Sheet2
	V (mL), 5 uCi/mL	Working volume	Nominal Concentration, uCi/mL	Nominal Concentration, uCi/kg	Nominal Activity, uCi	Scintilation intensity, CPM	Estimated concentration, uCi/mL	Estimated concentration, uCi/kg	Estimated Activity, uCi	Recovery (%), uCi/mL	Recovery (%), uCi
						239
	0.001	25	0.005	125	0.125	10291	0.00423234	105.808	0.105808	84.6468	84.6468
	0.01	25	0.05	1250	1.25	99837	0.0425489	1063.72	1.06372	85.0978	85.0978
	0.1	25	0.5	12500	12.5	839291	0.35896	8973.99	8.97399	71.7919	71.7919
	0.2	25	1	25000	25	1909382	0.816849	20421.2	20.4212	81.6849	81.6849
	Slope	2337006
	blank	400
											`
