# Supplementary material for: Depletion of [³H] Amitraz in Sheep
Source: Research Square preprint supplement (doi:10.21203/rs.3.rs-7792400/v1), 2025-11-07
Supplement: Supplementary file 9 [file a6d497f34b0536223a4f4fc1.xlsx]

## Sheet: Sheet2
	V (mL), 5 uCi/mL	Working volume	Nominal Concentration, uCi/mL	Nominal Concentration, uCi/kg	Nominal Activity, uCi	Scintilation intensity, CPM	Estimated concentration, uCi/mL	Estimated concentration, uCi/kg	Estimated Activity, uCi	Recovery (%), uCi/mL	Recovery (%), uCi
						239
	0.01	25	0.05	1250	1.25	93922	0.0469971	1174.93	1.17493	93.9942	93.9942
	0.1	25	0.5	12500	12.5	899292	0.452366	11309.1	11.3091	90.4731	90.4731
	0.2	25	1	25000	25	1904948	0.958545	23963.6	23.9636	95.8545	95.8545
	0.5	25	2.5	62500	62.5	4300291	2.1642	54104.9	54.1049	86.5679	86.5679
	Slope	1986760
	blank	550
											`
