# Supplementary material for: Depletion of [³H] Amitraz in Sheep
Source: Research Square preprint supplement (doi:10.21203/rs.3.rs-7792400/v1), 2025-11-07
Supplement: Supplementary file 10 [file c06ad31b88e7af9c72c14327.xlsx]

## Sheet: Sheet1
		Feces		uCi
	70 uCi/sheep
		0	1	3	5	7	24	72	5	7	14	21	28
	Sheep | Hours	0	1	3	5	7	24	72	120	168	336	504	672
	1	0.001	0.218	0.455	0.132	0.096	0.111
	2	0.001	0.176	0.301	0.143	0.119	0.101
	3	0.001	0.179	0.563	0.142	0.082	0.093
	4	0.001	0.175	0.297	0.191	0.108	0.093	0.072
	5	0.001	0.152	0.549	0.109	0.122	0.111	0.093
	6	0.001	0.143	0.296	0.168	0.134	0.102	0.075
	7	0.001	0.206	0.442	0.14	0.105	0.058	0.051	0.034
	8	0.001	0.175	0.347	0.174	0.131	0.121	0.084	0.056
	9	0.001	0.218	0.491	0.135	0.16	0.107	0.103	0.083
	10	0.001	0.118	0.316	0.145	0.146	0.117	0.09	0.083	0.061
	11	0.001	0.214	0.53	0.162	0.084	0.133	0.109	0.1	0.1
	12	0.001	0.181	0.281	0.173	0.142	0.103	0.089	0.063	0.044
	13	0.001	0.168	0.516	0.131	0.143	0.096	0.069	0.063	0.048	0.049
	14	0.001	0.145	0.255	0.146	0.072	0.046	0.038	0.034	0.03	0.025
	15	0.001	0.193	0.626	0.153	0.127	0.165	0.127	0.115	0.083	0.063
	16	0.001	0.167	0.392	0.177	0.075	0.049	0.024	0.024	0.034	0.01	0.017
	17	0.001	0.171	0.475	0.139	0.159	0.101	0.066	0.05	0.05	0.048	0.045
	18	0.001	0.189	0.317	0.21	0.121	0.09	0.083	0.054	0.036	0.016	0.018
	19	0.001	0.163	0.49	0.106	0.127	0.114	0.093	0.068	0.065	0.05	0.046	0.02
	20	0.001	0.134	0.258	0.183	0.097	0.045	0.035	0.028	0.013	0.01	0.01	0.01
	21	0.001	0.181	0.571	0.165	0.17	0.104	0.07	0.075	0.069	0.065	0.06	0.03
	min	0.001	0.118	0.255	0.106	0.072	0.045	0.024	0.024	0.013	0.01	0.01	0.01
	max	0.001	0.218	0.626	0.21	0.17	0.165	0.127	0.115	0.1	0.065	0.06	0.03
	average	0.001	0.174571	0.417524	0.153524	0.12	0.0980952	0.0761667	0.062	0.05275	0.0373333	0.0326667	0.02
	stdev	4.33681e-19	0.0262235	0.116125	0.0253989	0.027838	0.028457	0.0259599	0.0255003	0.0232132	0.0209125	0.0184902	0.00816497
