# Supplementary material for: Depletion of [³H] Amitraz in Sheep
Source: Research Square preprint supplement (doi:10.21203/rs.3.rs-7792400/v1), 2025-11-07
Supplement: Supplementary file 11 [file d3f820681e74edb2164ead1b.xlsx]

## Sheet: Sheet1
			Milk	uCi
	70 uCi/sheep
							1	3	5	7	14	21	28
	Sheep | Hours	0	1	3	5	7	24	72	120	168	336	504	672
	1	0.014	0.12	0.25	0.31	0.14	0.17	0.11	0.1	0.09	0.05	0.03	0.01
	2	0.014	0.15	0.27	0.27	0.16	0.14	0.09	0.07	0.07	0.04	0.01	0.01
	3	0.014	0.16	0.3	0.23	0.13	0.12	0.09	0.09	0.09	0.04	0.01	0.01
	4	0.014	0.14	0.29	0.26	0.15	0.13	0.11	0.09	0.08	0.04	0.02	0.01
	5	0.014	0.13	0.28	0.25	0.14	0.15	0.1	0.08	0.07	0.03	0.01	0.01
	6	0.014	0.17	0.26	0.24	0.16	0.14	0.09	0.07	0.06	0.03	0.01	0.01
	min	0.014	0.12	0.25	0.23	0.13	0.12	0.09	0.07	0.06	0.03	0.01	0.01
	max	0.014	0.17	0.3	0.31	0.16	0.17	0.11	0.1	0.09	0.05	0.03	0.01
	average	0.014	0.145	0.275	0.26	0.146667	0.141667	0.0983333	0.0833333	0.0766667	0.0383333	0.015	0.01
	stdev	0	0.0170783	0.0170783	0.0258199	0.0110554	0.0157233	0.00897527	0.0110554	0.0110554	0.00687184	0.00763763	0
