# Supplementary material for: Depletion of [³H] Amitraz in Sheep
Source: Research Square preprint supplement (doi:10.21203/rs.3.rs-7792400/v1), 2025-11-07
Supplement: Supplementary file 12 [file e703f707a286f8ea48febf6e.xlsx]

## Sheet: Sheet1
	70 uCi/sheep		Blood	uCi
							1	3	5	7	14	21	28
	Sheep | Hours	0	1	3	5	7	24	72	120	168	336	504	672
	1	0.01	18.07	15.71	18.07	12.59	3.69
	2	0.01	8.41	35.31	39.98	30.09	3.89
	3	0.01	21.5	19.73	21.5	15.3	4.54
	4	0.01	6.24	39.4	46.03	34.96	1.7	1.08
	5	0.01	18.59	16.82	18.59	12.26	3.17	2.5
	6	0.01	5.62	39.19	45.36	35.02	3.31	2.52
	7	0.01	17.05	14.98	17.05	11.89	4.23	4.55	3.75
	8	0.01	7.36	36.93	40.74	26.7	3.31	3.84	3.17
	9	0.01	20.56	17.83	20.56	15.74	4.24	3.77	2.72
	10	0.01	7.32	42.52	48.2	35.75	2.57	1.6	1.32	0.85
	11	0.01	15.97	14.24	15.97	12.29	3.48	2.03	1.76	1.43
	12	0.01	6.48	43.16	46.52	35.41	1.49	1.75	1.41	1.25
	13	0.01	15.45	13.14	15.45	10.69	3.81	3.03	2.18	2.88	2.9
	14	0.01	7.4	36.86	42.35	31.89	1.86	1.33	1.32	0.23	0.05
	15	0.01	20.62	18.92	20.62	15.29	2.93	2.96	2.11	1.43	1.79
	16	0.01	8.79	37.18	41.23	27.3	0.47	1.36	1.43	1.39	1.15	1.19
	17	0.01	16.68	14.91	16.68	12.29	4.27	3.18	3.41	3.17	2.62	2.62
	18	0.01	6.76	42.13	46.93	32.16	1.33	0.68	0.57	1.18	2.09	2.19
	19	0.01	16.44	14.34	16.44	11.51	5.63	4.87	3.69	3.26	3.46	3.29	2.52
	20	0.01	8.43	36.58	42.58	32.67	2.12	1.6	1.07	0.72	0.86	1.45	0.74
	21	0.01	20.24	18.52	20.24	14.91	2.73	1.82	1.22	1.52	1	1.31	0.84
	min	0.01	5.62	13.14	15.45	10.69	0.47	0.68	0.57	0.23	0.05	1.19	0.74
	max	0.01	21.5	43.16	48.2	35.75	5.63	4.87	3.75	3.26	3.46	3.29	2.52
	average	0.01	13.0467	27.0667	30.5281	22.2243	3.08429	2.47056	2.07533	1.60917	1.76889	2.00833	1.36667
	stdev	1.73472e-18	5.73259	11.5564	13.0645	9.82551	1.22814	1.17923	0.997563	0.934474	1.03934	0.76582	0.816551
		0	1	3	5	7	24	72	120	168	336	504	672
	average	0.01	13.0467	27.0667	30.5281	22.2243	3.08429	2.47056	2.07533	1.60917	1.76889	2.00833	1.36667
	stdev	1.73472e-18	5.73259	11.5564	13.0645	9.82551	1.22814	1.17923	0.997563	0.934474	1.03934	0.76582	0.816551
